# Supplementary material
Source: PubMed Central journal article supplement (PMC4827285)
Supplement: Supp_Figure1.pdf [file Supp_Figure1.pdf]

## Supplementary Data

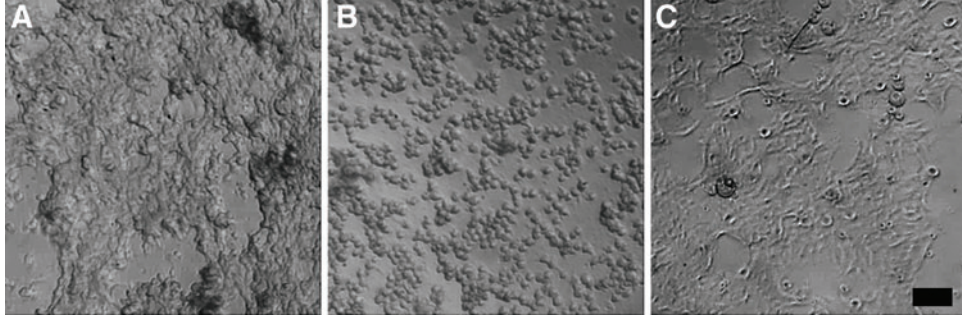

**SUPPLEMENTARY FIG. S1.** Three cell lines grown on the flat methacrylate PEGDA surface (day 6). (A) SUM159, (B) MDA-MB-231, and (C) HCC1806. Phase contrast images are shown. Scale bar is 50  $\mu\text{m}$ . PEGDA, poly (ethylene glycol) diacrylate.
